# Supplementary material for: Extracellular CahB1 from Sodalinema gerasimenkoae IPPAS B-353 Acts as a Functional Carboxysomal β-Carbonic Anhydrase in Synechocystis sp. PCC6803
Source: MDPI journal article supplement (doi:10.3390/plants12020265), 2023-01-06

## Original Images for Blots and Gels

Genotyping PCR gels *ccaA* locus and PpsbA2:*cahB1* expression construct amplicons. Original and unadjusted gels showing two technical replicates (top/bottom) of two biological replicates (left-right) are provided.

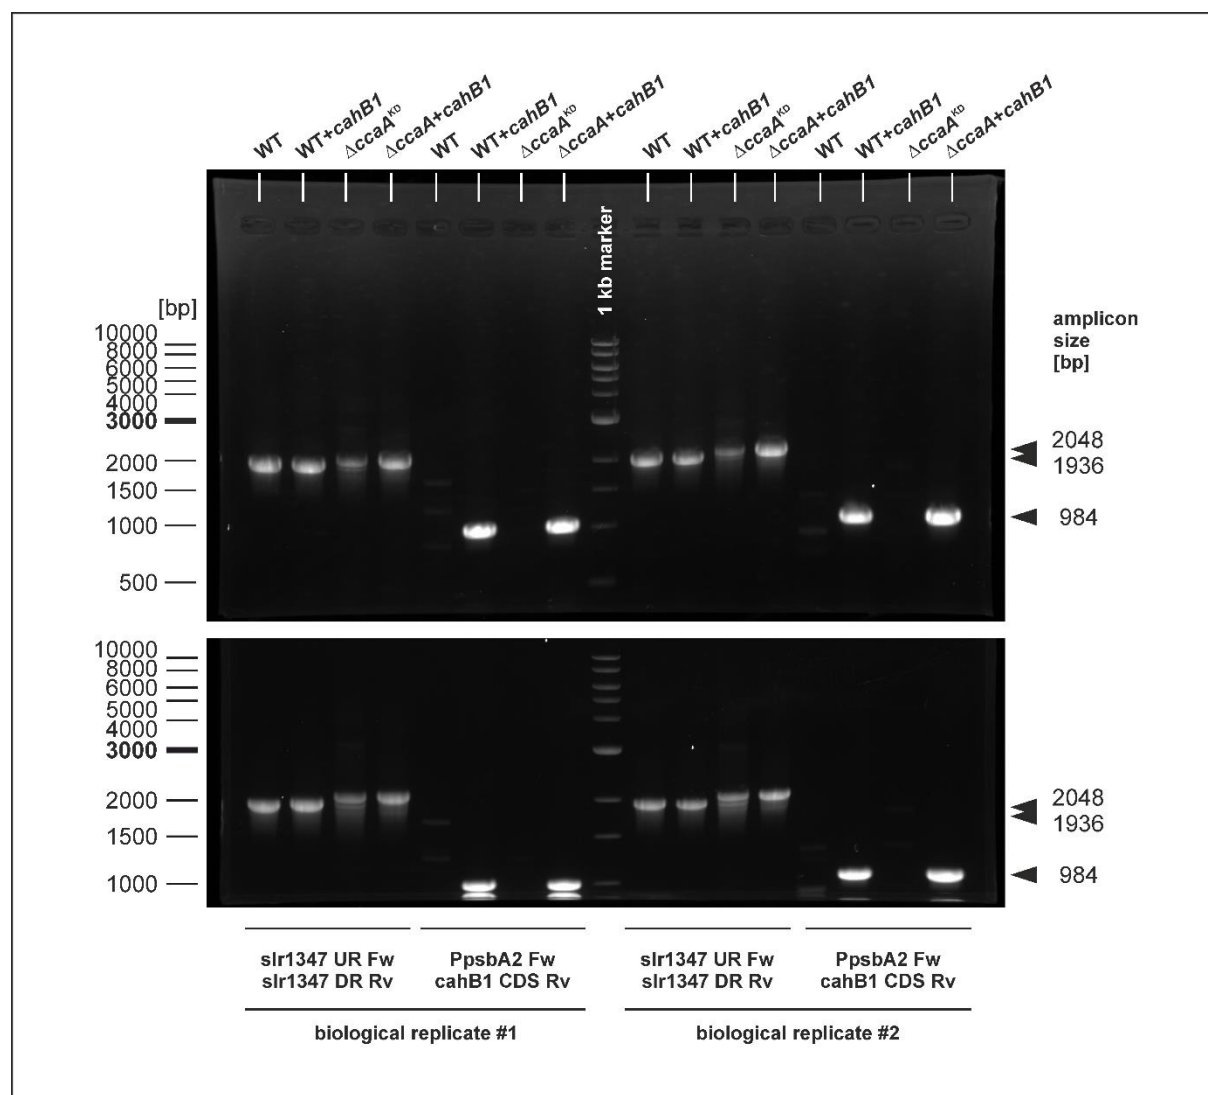

### Concerning Figure 3 b/c:

Coomassie brilliant blue (CBB) stained PVDF membranes and immunoblot ECL (enhanced chemi-luminescence) detection of RbcL, CahB1, and PsbA (after re-probing the CahB1 segments of the membranes).

Original and unadjusted blot images showing results for total (T), soluble (S), pelletable (P), solubilizable ( $P_s$ ) and insolubilizable ( $P_i$ ) pelletable (sub-) fractions of *Synechocystis* cells. Three biological replicates of WT (top-left), WT+*cahB1* (top-right),  $\Delta$ *ccaA*<sup>KD</sup> (bottom left), and  $\Delta$ *ccaA*+*cahB1* are provided.

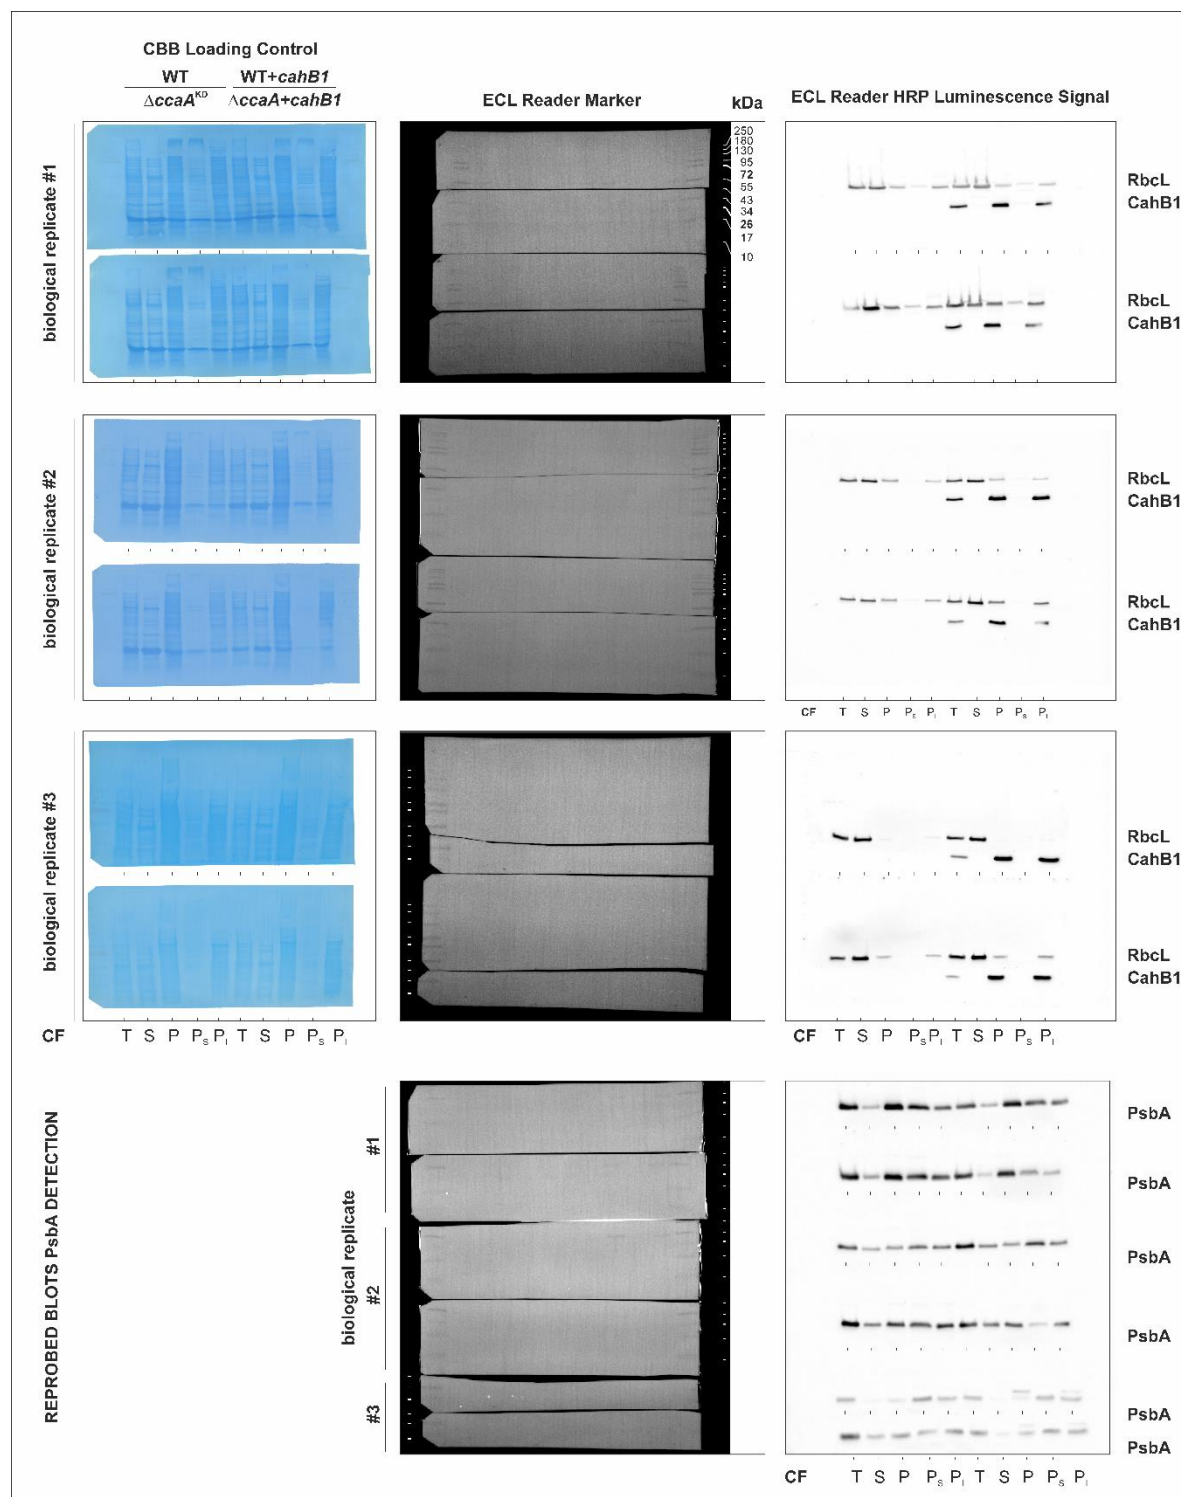

Supplement: s1 [file s1]
