# Supplementary material for: Extracellular CahB1 from Sodalinema gerasimenkoae IPPAS B-353 Acts as a Functional Carboxysomal β-Carbonic Anhydrase in Synechocystis sp. PCC6803
Source: MDPI journal article supplement (doi:10.3390/plants12020265), 2023-01-06
Supplement: s1 [file s1]

### CcaA/CahB1/EcaB N-terminal Secretion Signal Prediction Software Outputs

Top: Protein sequence as extracted from NCBI Genbank  
Middle: SignalP v. 6.0 graphic output (<https://services.healthtech.dtu.dk/service.php?SignalP>)  
Bottom: DeepTMHMM graphic output (<https://dtu.biolib.com/DeepTMHMM>)

>WP\_011055160.1 carbonic anhydrase [Synechococcus elongatus PCC7942]

MTVLTEVLEANQAYAAAFGEKGSALPPARQFAILTCMDARLDPAQYAGLKEGDAHVIRNAGGRASDDAIRSLVISYKLLGTKEWFEVIH  
HTDCGMEFFTNSVIGSLLANSLETAVLRSDGFTDIGEGPGSEEGKYIHWLTIENTQTSVVEDVQRIRRHPLVPSNIPIYGYLYDVRSGRLL  
EVPEATTAGVAR

Sequence  
Prediction: Other

| Protein type | Other | Signal Peptide (Sec/SPI) | Lipoprotein signal peptide (Sec/SPII) | TAT signal peptide (Tat/SPI) | TAT Lipoprotein signal peptide (Tat/SPII) | Pilin-like signal peptide (Sec/SPIII) |
|--------------|-------|--------------------------|---------------------------------------|------------------------------|-------------------------------------------|---------------------------------------|
| Likelihood   | 1     | 0                        | 0                                     | 0                            | 0                                         | 0                                     |

Download: [PNG](#) / [EPS](#) / [Tabular](#)

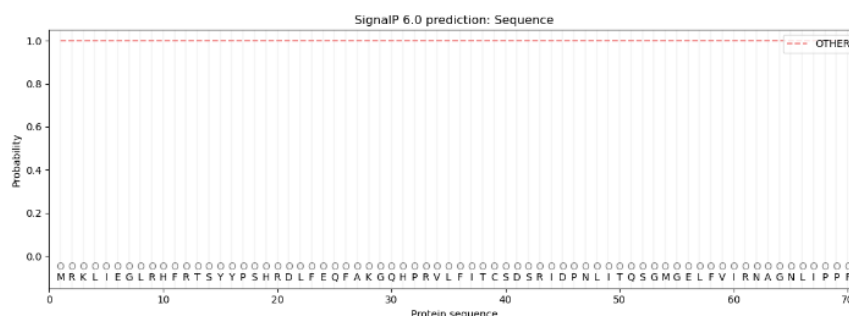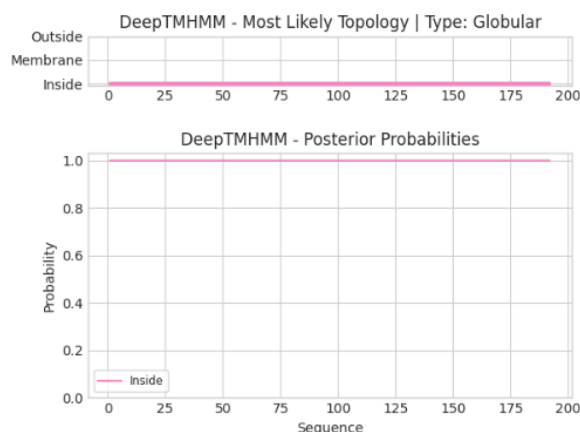

MTVLTEVLEAANQAYAAAFGEKGSALPPARQFAILTCDARLDPAQYAGLKEGDAHVIRNAGGRASDDAIRSLVISYKLLGTKEWFVIHHTDCGMEFFTNISVIGSLLANSLETAVLRS DGF TDI  
GEGPGSEEGKYIHWLTIENOTOSVVEDVORIRRHPLVPSNIPYGYLDVRSGR LIEVPEATTAGVAR

```
IIIIIIIIIIIIIIIIIIIIIIIIIIIIIIIIIIIIIIIIIIIIIIIIIIIIIIIIIIIIIIIIIIIIIIIIIII
IIIIIIIIIIIIIIIIIIIIIIIIIIIIIIIIIIIIIIIIIIIIIIII
```

MKKLLKGLRQFKSNYFSTHQELFEQLSHGQKPRVLFITCSDSRIDPNLITNAEVLGELFVIRNAGNIIPPGAANGGEGAAVEYAVQALGV  
EHIIVCGHSHCGAMKGLLKRSSLEDEMPVYEWLRHAEATRQLLKENYSHLEGETLLEVAVAENVLTQIENLRTPVIHSLYRNKLHLH  
AWIYHIETGEVLEYDSIRHDFVTPDENAMLEAYPVQCVLSLPEDVEELVPGHRQSSAPAQTEVAAADRDAKMPWLSSEQVARIHGG  
NGRR

**Prediction:** Other

| Protein type | Other  | Signal Peptide (Sec/SPI) | Lipoprotein signal peptide (Sec/SPII) | TAT signal peptide (Tat/SPI) | TAT Lipoprotein signal peptide (Tat/SPII) | Pilin-like signal peptide (Sec/SPIII) |
|--------------|--------|--------------------------|---------------------------------------|------------------------------|-------------------------------------------|---------------------------------------|
| Likelihood   | 1.0001 | 0                        | 0                                     | 0                            | 0                                         | 0                                     |

SignalP 6.0 prediction: Sequence

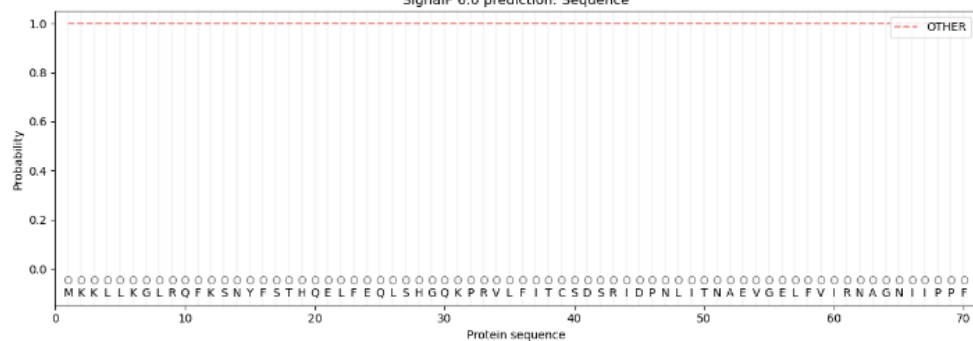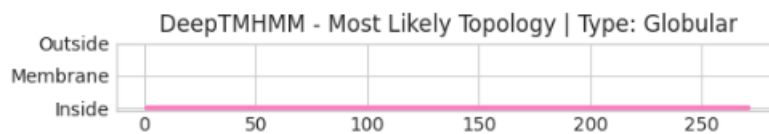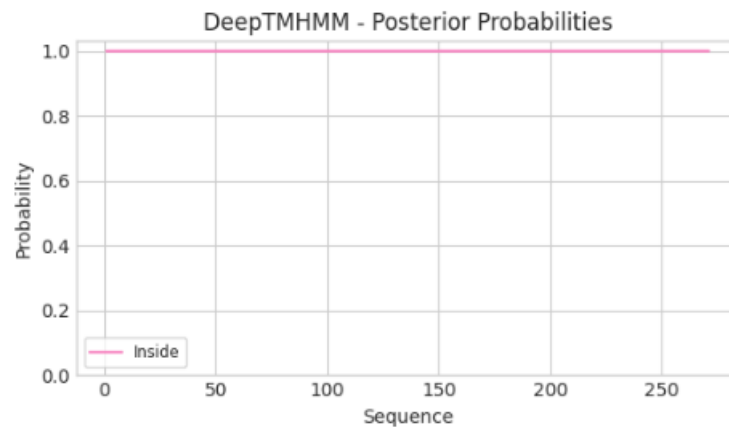

MKLLKGLRQFKSNYFSTHQELFEQLSHGQKQFVLVITCSDSRIDPNLITNAEVLGELFVIRNAGNIIPFPGAANGGEGAAVEYAVQALGVEHIIVCGHSHCGAMKLLKRSSLEDEMPLVYEWL  
 RHABATRLKLENYHGETTLLVAVAEVLTQIENLRTPVISHKLRNKLHLAWIYHIETGEVLEYDSIRHDFVTPDENAMLEAYPVQCVLSLPEDVEELVPGHRQSSAPAQTEVAAADR  
 DAKMPFLSSEQVARIHGSGNGRR

[illegible]

MQRLEGLQKFREGYFSSHRDLFEQLSHGQHPRILFICCCSDSRVDPNLITQSEVGDLFVIRNAGNIIPPYGAANGGEGAAMEYALVALEI  
 NQIIVCGSHSHCGAMKGLLKLNSLQEKLPLVYDWLKHTEATRRLVDNYSHLEGEDLIEVAVAENILTQLKNLQTPAIHSRLHRGDLSLH  
 GWIYRIEEGEVLAYDGVLDHDFVAPQSRINALEPEDEYAPHPNSPLISYDAFKVPGKERPGREKATESPAPQLSPLPGFGLHPREQAERIY  
 RGSR

**Prediction:** Other

| Protein type | Other | Signal Peptide (Sec/SPI) | Lipoprotein signal peptide (Sec/SPII) | TAT signal peptide (Tat/SPI) | TAT Lipoprotein signal peptide (Tat/SPII) | Pilin-like signal peptide (Sec/SPIII) |
|--------------|-------|--------------------------|---------------------------------------|------------------------------|-------------------------------------------|---------------------------------------|
| Likelihood   | 1     | 0                        | 0                                     | 0                            | 0                                         | 0                                     |

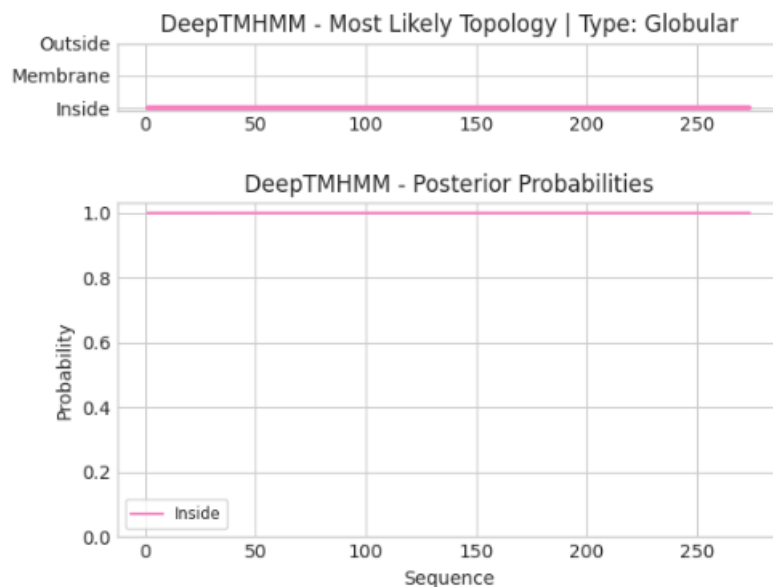[illegible]

MRKLTIEGLRHFRTSYPPSHRDLFEQFAKGQHPRVLFITCSDSRIDPNLITQSGMGELFVIRNAGNLIPPGAANGGEGASIEYAIAALNIE  
HVVVCGHSHCGAMKGLLNQLQEDMPLVYDWLQHAQATRRLVDNYSGYETDDLVEILVAENVLTQIENLKTYPIVRSRLFQGKLQI  
FGWIYEVESEGEVLQISRTSSDDTGIDECVPRLPGSQEKAILGRCVPLTEEVAVAPPEPEPVIAAVAAPPANYSSRGWLAPEQQQRIYRG  
NAS

**Prediction:** Other

| Protein type | Other | Signal Peptide (Sec/SPI) | Lipoprotein signal peptide (Sec/SPII) | TAT signal peptide (Tat/SPI) | TAT Lipoprotein signal peptide (Tat/SPII) | Pilin-like signal peptide (Sec/SPIII) |
|--------------|-------|--------------------------|---------------------------------------|------------------------------|-------------------------------------------|---------------------------------------|
| Likelihood   | 1     | 0                        | 0                                     | 0                            | 0                                         | 0                                     |

SignalP 6.0 prediction: Sequence

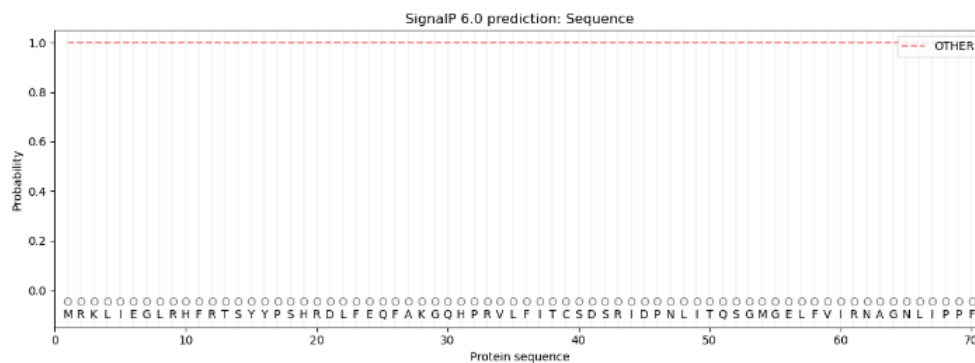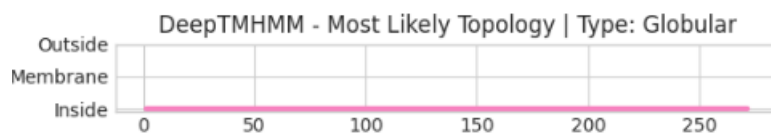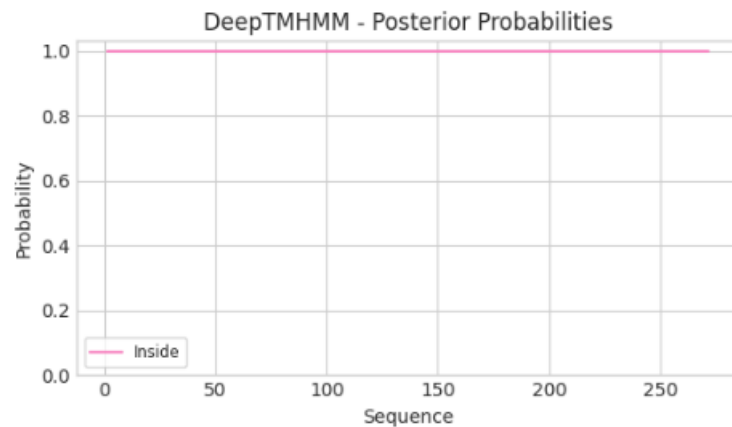

MRKLI EGRHFRSTSYPPSHRDLFEQFAKGQHPRVLFITCSDSRIDPNLITQSGMGE L FVRNAGNLIPFGAANGGEGASIEY AIAALNIEHV VVCGSHSGAMG L LKLNQLQEDMPLVYDWL  
QHAQATRRLLVDNYSGYETDDLVEILVAENVLTQIENLKTYPIVRSRLFQGKLQIFGWIYEVESGEVLQISRTSSDDTGIDECPVRLPGSQEKAILGRCVVPLTEEVAVAPPEPEPVIAA VAP  
PANYSSRGWL APEQQORIYRGNAS

```

#####
#####
#####
```

>WP\_012307606.1 carbonic anhydrase CcaA [Synechococcus PCC7002]

MKKILIRGLDKFKQSYVASHQDLFEQLSHGQKPRVLFICCSDSRVDPALITQTDIGEIVIRNAGNIIPPYGAANGGEGGTLEYALQGLDIR  
 QIIVCGHSHCGAMKGLLKNLQADMPLVYDWLKHAEATRRLVRDTPHCEGEELVETLVAENVLVQIDNLKTPVVRSLHQGKLKI  
 YGWIYNIENGEVLAYDETKHAYVKPDYSLIDETPLTEREALGECPLPYTVASGQSLAGWYGETDTFSVSG

## Sequence

**Prediction:** Other

| Protein type | Other | Signal Peptide (Sec/SPI) | Lipoprotein signal peptide (Sec/SPII) | TAT signal peptide (Tat/SPI) | TAT Lipoprotein signal peptide (Tat/SPII) | Pilin-like signal peptide (Sec/SPIII) |
|--------------|-------|--------------------------|---------------------------------------|------------------------------|-------------------------------------------|---------------------------------------|
| Likelihood   | 1     | 0                        | 0                                     | 0                            | 0                                         | 0                                     |

Download: [PNG](#) / [EPS](#) / [Tabular](#)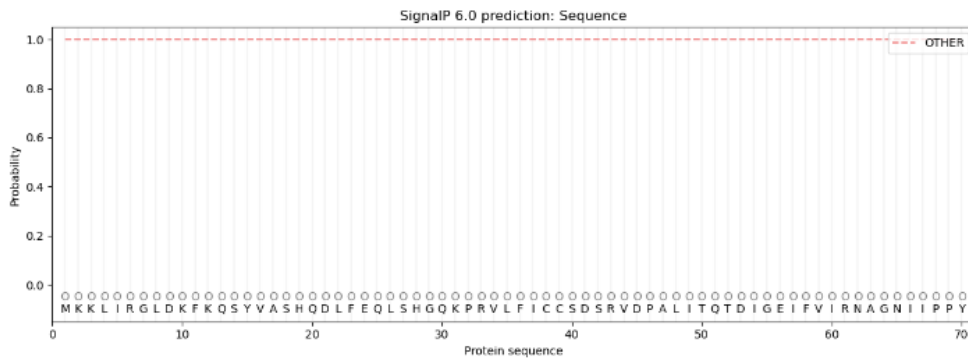

DeepTMHMM - Most Likely Topology | Type: Globular

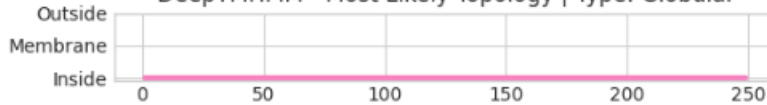

### DeepTMHMM - Posterior Probabilities

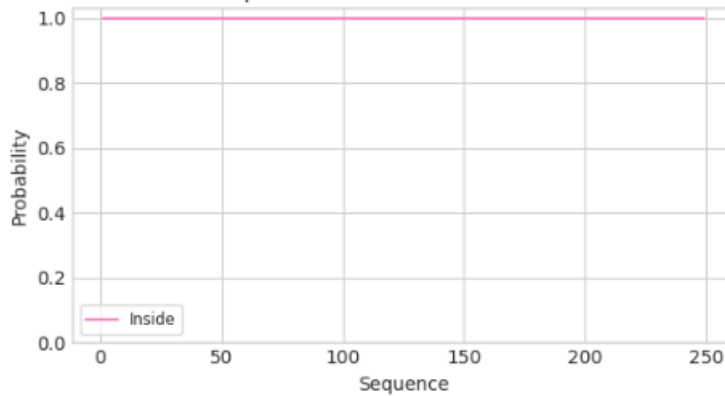

MKKLIRGLDKFKQSYVASHQDLFEQLSHGQKPRVLFICCDSDRVPALITQTDIGEIVIRNAGNIIPPYGAANGEGGGTLEYALQGLDIRQIIICVGHSHCGAMKGLLKNKLQADMPLVYDWL  
 KHAETARRLRDTPHCEGEELVETLVAENVLVQIDNLKTPVVRSLHQGKLIYGIWYNIENGEVLAYDETKHAYVKPDYSIIDETPLTEREALGCPLPYTVASGQSLAGWYGETDTSFVS  
 G

```
I
I
I
```

MKKLVRLQEFKQSYVAQNQELLEELSHGQKPRVLFISCSDSRVDPNLITQTDVGELFVIRNAGNIVPPYGAANGGEGGTIEYAIAALEI  
 DQVVICGSHSHCGAMKGLMKNLQADMPVLDWLQHAETTRRLVAENYPESQGEERVEILVAENVLVQIDNLKTYPIVRSRLQGKL  
 QIYGWIYHIETGEVLAYDDQTHYIPPSQLLDPPLPSRLEQYLISTHAPPVACEVPAPRLQSASSSPAASPVNGTPAADRIRSQLNAL  
 LKASPDWVDVEDRMRSMSKLLDARHEGMSASEAQNYHHQFSEQIPRWLRQMG

**Prediction:** Other

| Protein type | Other | Signal Peptide (Sec/SPI) | Lipoprotein signal peptide (Sec/SPII) | TAT signal peptide (Tat/SPI) | TAT Lipoprotein signal peptide (Tat/SPII) | Pilin-like signal peptide (Sec/SPIII) |
|--------------|-------|--------------------------|---------------------------------------|------------------------------|-------------------------------------------|---------------------------------------|
| Likelihood   | 1     | 0                        | 0                                     | 0                            | 0                                         | 0                                     |

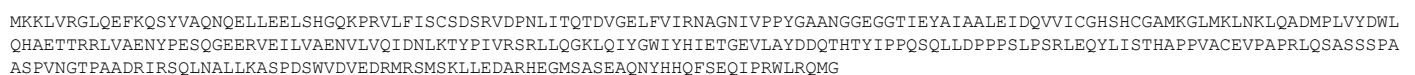[illegible]

MKKLIKGLREFKSSYFSANEELFEQLSHGQKPRVLFITCSDSRIDPNLITQAGLGELFVIRNAGNIIPPFGATNGGEGATIEYAIQALDIQQII  
VCGHSHCGAMKGLMKLDSLVRVEMPLVHDWLKYAEATRRLVKDNYSHYEGEELLEIIIAENVLTQIENLRTPVIRSKLHQGQLSIYAWIY  
QIETGEILAYDPQKHAYVLPQNQLLSSEIDETLLSPPLNSNVEIHFTKTQQRPFQSSGELPIPTHEWFPMTVLSPEQMERIYRGSATK

**Prediction:** Other

| Protein type | Other  | Signal Peptide (Sec/SPI) | Lipoprotein signal peptide (Sec/SPII) | TAT signal peptide (Tat/SPI) | TAT Lipoprotein signal peptide (Tat/SPII) | Pilin-like signal peptide (Sec/SPIII) |
|--------------|--------|--------------------------|---------------------------------------|------------------------------|-------------------------------------------|---------------------------------------|
| Likelihood   | 1.0001 | 0                        | 0                                     | 0                            | 0                                         | 0                                     |

SignalP 6.0 prediction: Sequence

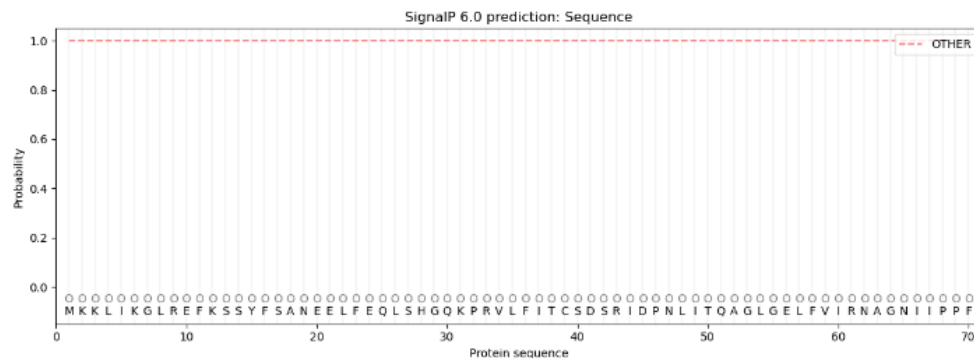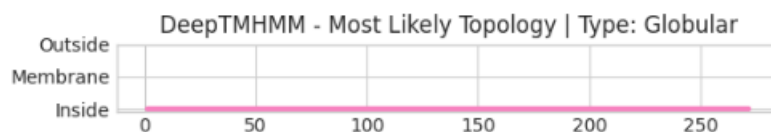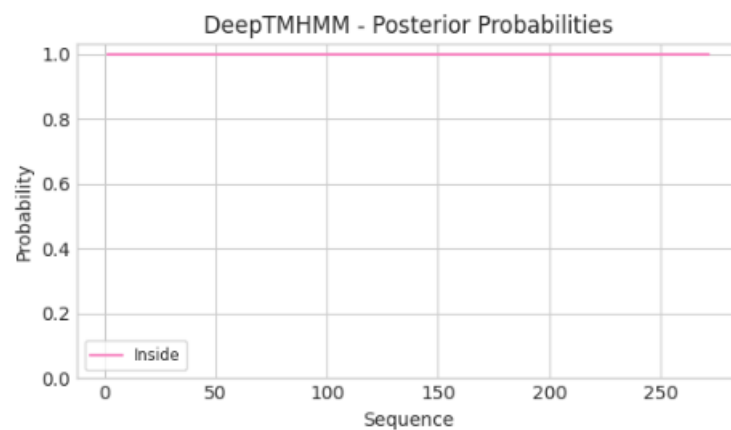

MKKLIKGLREFKSSYFSANEELFEQLSHGQKPRVLFITCSDSRIDPNLITQAGLGELFVIRNAGNIIPFGATNGEGATIEYAIQALDIQIIVCGHSHCGAMKGLMKLDSLVRVEMPLVHVDL  
 KYAEATRRLVKDNYSHYEGEELLEIIIAENVLTQIENLRTPVIRSKLHQGLSIYAWIYQIETGEILAYDPQKHAYVLPQNQLLSSEIDETLLSPPLNSNVEIHFTTKTQQRPFQSSGELPIPT  
 HEWFPMTVLSPEQMERIYRGSATK

[illegible]

MMGKIEKFALTQNTSVFLVLPDTQLNYPMAKIPTIDRRQLIQYGGAFGLTSLMATILGNQMAGNPAAQAQSANQTPQQLLTELME  
GNGRFAAQKRVKANQDLYRLAEVAQGQNPFAAILSCADSRVPPEIIFDQGLGDLFICRIAGNVATPQEVGSLEFGTLVLGAKVLMVLG  
HQGCGAVKAAMDGGDLPGQIGSVIKKIDIGSVTDDSSNAASVVMATKANVEHQMAVLIQSPVLSQLIAEERLLIMGAYYNLESGIVTL  
L

**Prediction:** Other

| Protein type | Other | Signal Peptide (Sec/SPI) | Lipoprotein signal peptide (Sec/SPII) | TAT signal peptide (Tat/SPI) | TAT Lipoprotein signal peptide (Tat/SPII) | Pilin-like signal peptide (Sec/SPIII) |
|--------------|-------|--------------------------|---------------------------------------|------------------------------|-------------------------------------------|---------------------------------------|
| Likelihood   | 1     | 0                        | 0                                     | 0                            | 0                                         | 0                                     |

SignalP 6.0 prediction: Sequence

Cleavage site between pos. 41 and 42. Probability 0.828795

| Protein type | Other | Signal Peptide (Sec/SPI) | Lipoprotein signal peptide (Sec/SPII) | TAT signal peptide (Tat/SPI) | TAT Lipoprotein signal peptide (Tat/SPII) | Pilin-like signal peptide (Sec/SPIII) |
|--------------|-------|--------------------------|---------------------------------------|------------------------------|-------------------------------------------|---------------------------------------|
| Likelihood   | 0     | 0                        | 0                                     | 0.9795                       | 0.0204                                    | 0                                     |

SignalP 6.0 prediction: Sequence

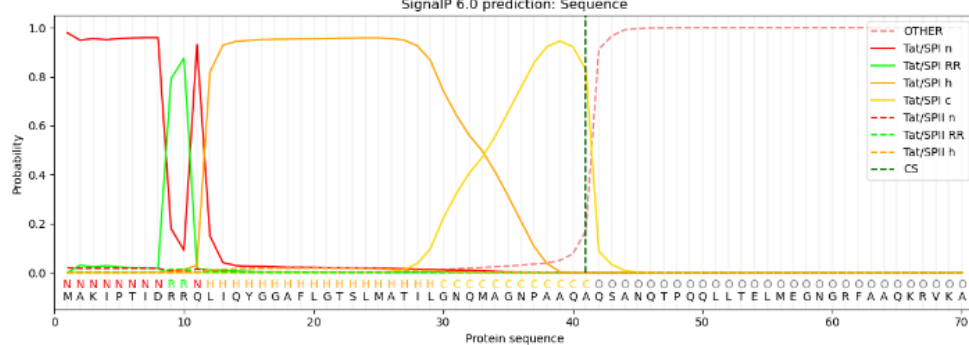



>RUR88685.1 carbonic anhydrase EcaB [Anabaena PCC 7120 = FACHB-418]

MLGKEMSRINGFIGRRNFLGLAGAGSLVVAANACAGSLTVGKEEPAIADVKSINLNPVNPQKALKLLLDG NQRFV KR K PKYPNQSRQK  
LQSIAKAQYPFAAILGCADSRVPAEIVFDQGLGDLFVVVRVAGNIASDMAIASLEYATSVLDTRLIVVLGHTKCGAVAASVKDEPLPGRIG  
YLAESIRPALSKLPSKSKDVNKA AVIANIQYQAEKLQQKSTILAQLVNKGTVQIIGAAYDIDTGT VSVIS

Sequence

Prediction: TAT Lipoprotein signal peptide (Tat/SPII)

Cleavage site between pos. 33 and 34. Probability 0.482341

| Protein type | Other | Signal Peptide (Sec/SPI) | Lipoprotein signal peptide (Sec/SPII) | TAT signal peptide (Tat/SPI) | TAT Lipoprotein signal peptide (Tat/SPII) | Pilin-like signal peptide (Sec/SPIII) |
|--------------|-------|--------------------------|---------------------------------------|------------------------------|-------------------------------------------|---------------------------------------|
| Likelihood   | 0     | 0                        | 0.0001                                | 0.3101                       | 0.6898                                    | 0                                     |

Download: PNG / EPS / Tabular

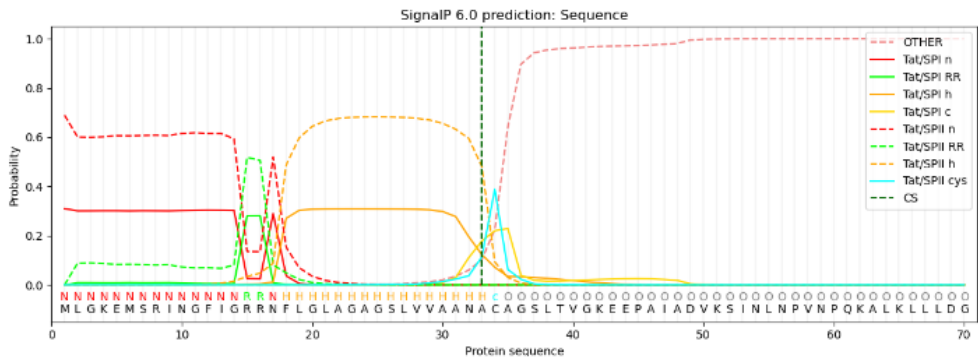

MKHFME~~RR~~DFLKLGMTGAFGMILSASDLLWRVEQAKAADIPSTSAESLSPDAALQKLI~~EG~~NQRFVDHHPQYPDQSELRLHEVAQAQ  
HPFATILSCADSRVPAEIVFDQGI~~GD~~IFDVRIAGNIATHEAIGSIEYAVVLLGSPLLMVMGHERCGAVTAAVQKESLPGDISTFVKAIKPAL  
KKVKDQPGDAVENAVVANVQYQIERLQKSKLLSEQVQSGKLKIVGGRYDLDTGRVTIIT

Cleavage site between pos. 37 and 38. Probability 0.863430

| Protein type | Other | Signal Peptide (Sec/SPI) | Lipoprotein signal peptide (Sec/SPII) | TAT signal peptide (Tat/SPI) | TAT Lipoprotein signal peptide (Tat/SPII) | Pilin-like signal peptide (Sec/SPIII) |
|--------------|-------|--------------------------|---------------------------------------|------------------------------|-------------------------------------------|---------------------------------------|
| Likelihood   | 0     | 0                        | 0                                     | 0.9999                       | 0.0001                                    | 0                                     |

Concerning Figure 1 b:

CcaA homologues N-terminal protein alignment (aa 1-50)

|                                     |              |   |   |   |   |   |   |   |   |   |   |   |   |   |   |   |   |   |   |   |   |   |   |   |   |   |   |   |   |   |   |   |   |   |   |   |   |   |   |   |   |   |   |   |   |   |   |   |   |   |    |    |    |
|-------------------------------------|--------------|---|---|---|---|---|---|---|---|---|---|---|---|---|---|---|---|---|---|---|---|---|---|---|---|---|---|---|---|---|---|---|---|---|---|---|---|---|---|---|---|---|---|---|---|---|---|---|---|---|----|----|----|
| <i>Synechocystis</i> sp. PCC6803    | <b>CcaA</b>  | 1 | M | R | L | I | E | C | L | Q | K | F | R | E | G | Y | F | S | S | H | R | D | L | F | E | Q | L | S | H | G | Q | H | P | R | I | L | F | I | C | S | D | S | R | V | D | P | N | I | L | T | 50 |    |    |
| <i>S.gerasimenkoeae</i> IPPAS B-353 | <b>CahB1</b> | 1 | M | K | K | L | L | K | G | L | R | F | K | S | N | Y | F | S | T | H | Q | E | L | F | E | Q | L | S | H | G | Q | K | P | R | V | L | F | I | T | C | S | D | S | R | E | D | P | N | I | L | T  | 50 |    |
| <i>N. punctiforme</i> sp. PCC73102  |              | 1 | M | K | K | L | I | K | G | L | R | E | F | K | S | S | Y | F | S | A | N | E | E | L | F | E | Q | L | S | H | G | Q | K | P | R | V | L | F | I | T | C | S | D | S | R | E | D | P | N | I | L  | T  | 50 |
| <i>Synechococcus</i> sp. PCC7002    |              | 1 | M | K | K | L | I | R | G | L | D | K | F | K | S | Y | V | A | S | H | Q | D | L | F | E | Q | L | S | H | G | Q | K | P | R | V | L | F | I | C | S | D | S | R | V | D | P | A | I | L | T | 50 |    |    |
| <i>A. marina</i> MBIC10699          |              | 1 | M | K | K | L | V | R | G | L | Q | E | F | K | S | Y | V | A | Q | N | Q | E | E | L | E | E | L | S | H | G | Q | K | P | R | V | L | F | I | S | C | S | D | S | R | V | D | P | N | I | L | T  | 50 |    |
| <i>Synechococcus</i> sp. PCC7942    |              | 1 | M | R | K | L | I | E | G | L | R | H | F | R | T | S | Y | Y | P | S | H | R | D | L | F | E | Q | F | A | K | G | Q | H | P | R | V | L | F | I | T | C | S | D | S | R | E | D | P | N | I | L  | T  | 50 |
